# Supplementary material for: Synthesis of azide/alkyne-terminal polymers and application for surface functionalisation through a [2 + 3] Huisgen cycloaddition process, “click chemistry”
Source: Royal Society of Chemistry journal article supplement (doi:10.1039/b618325e), 2007-01-01
Supplement: b618325e.pdf [file b618325e.pdf]

## Synthesis of Azide/Alkyne-terminal Polymer and its Application on Surface Functionalisation Through [2+3] Huisgen Cycloaddition Process, “click chemistry”.

Gaojian Chen, Lei Tao, Giuseppe Mantovani, Vincent Ladmiral, David P. Burt, Julie V. Macpherson and David M. Haddleton,\*

Supporting information

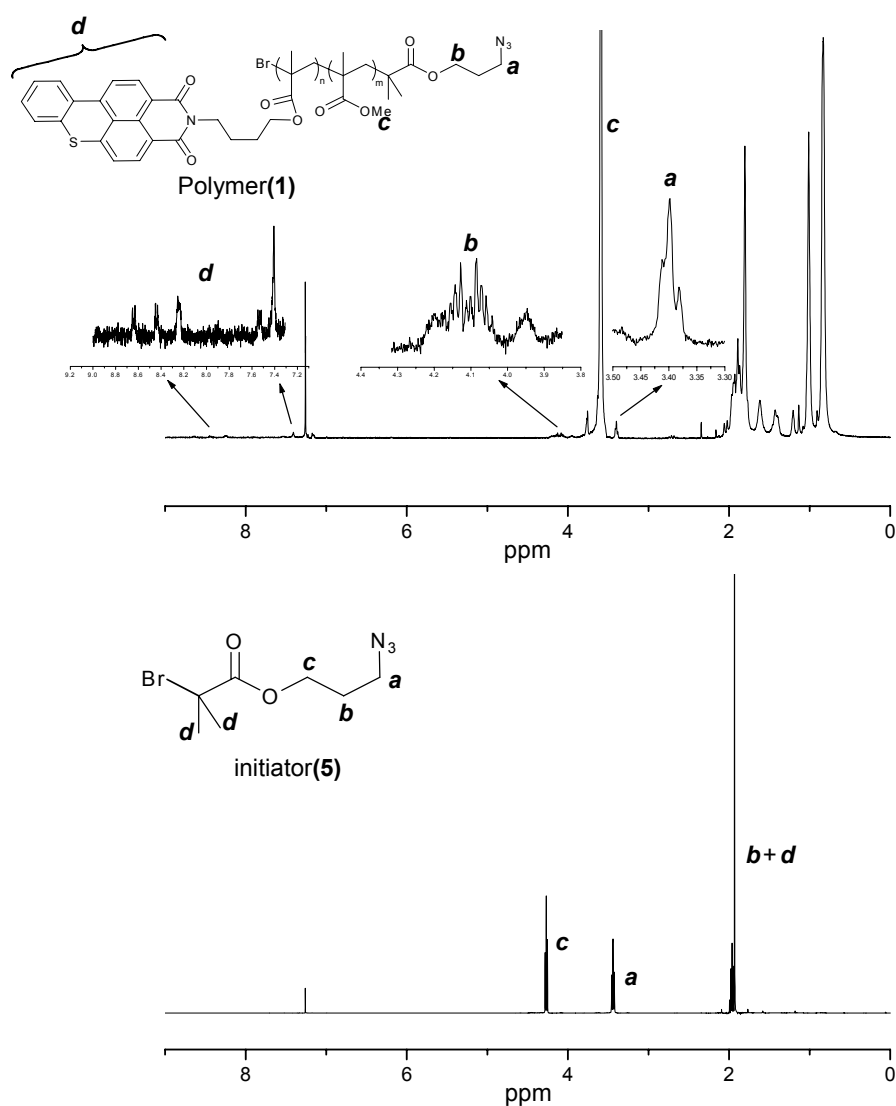

Figure S1 <sup>1</sup>H NMR spectra of polymer (1) and initiator (5).

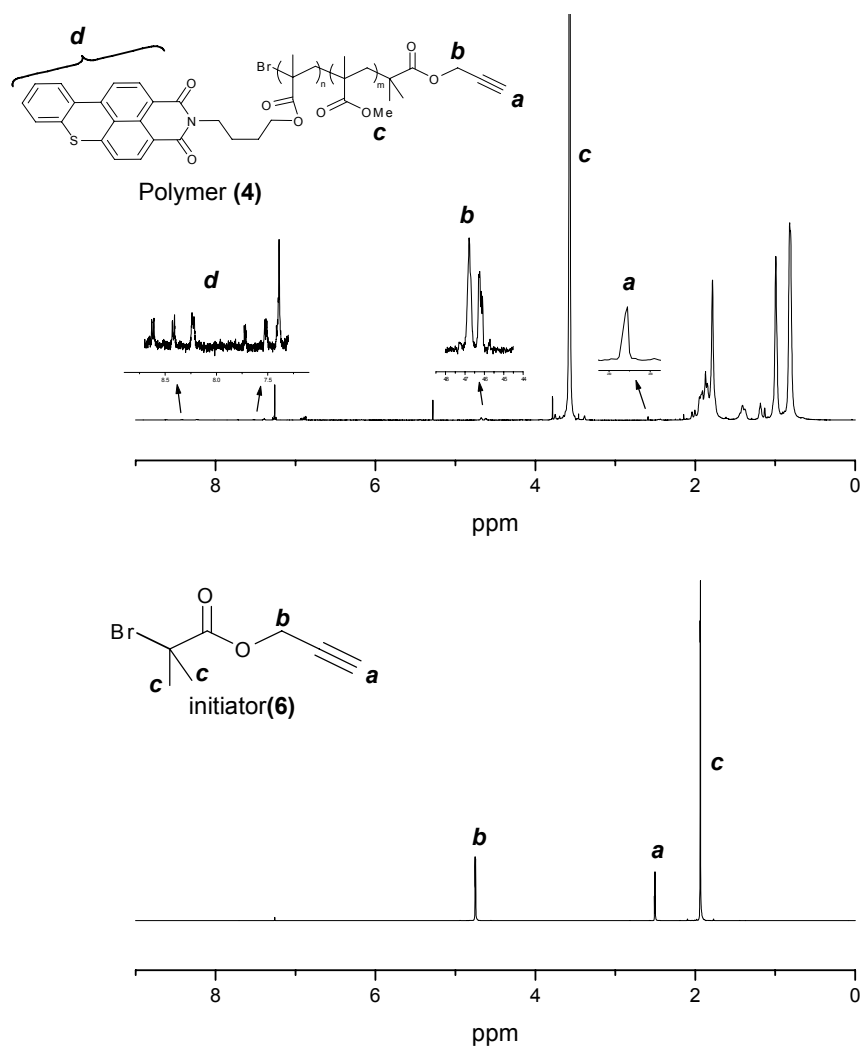

Figure S2 <sup>1</sup>H NMR spectra of polymer (4) and initiator (6).

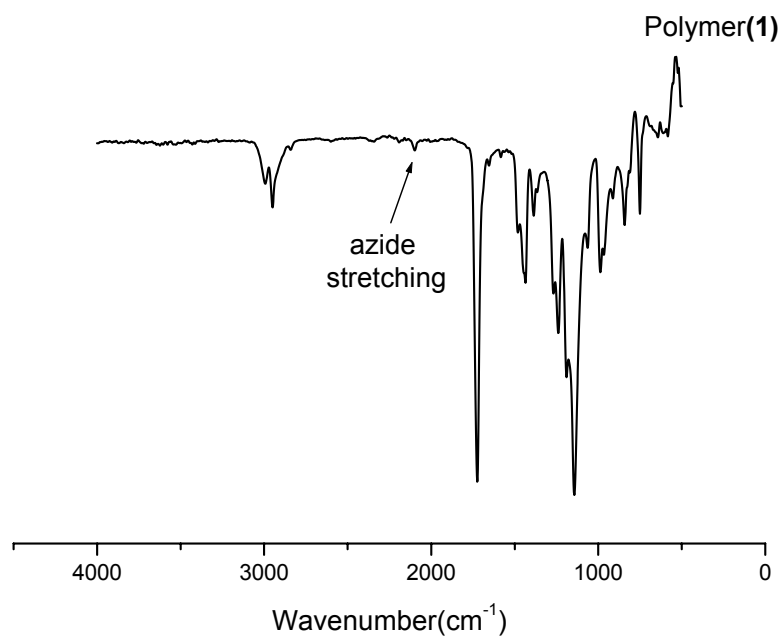

**Figure S3** FT-IR spectrum of polymer (1).

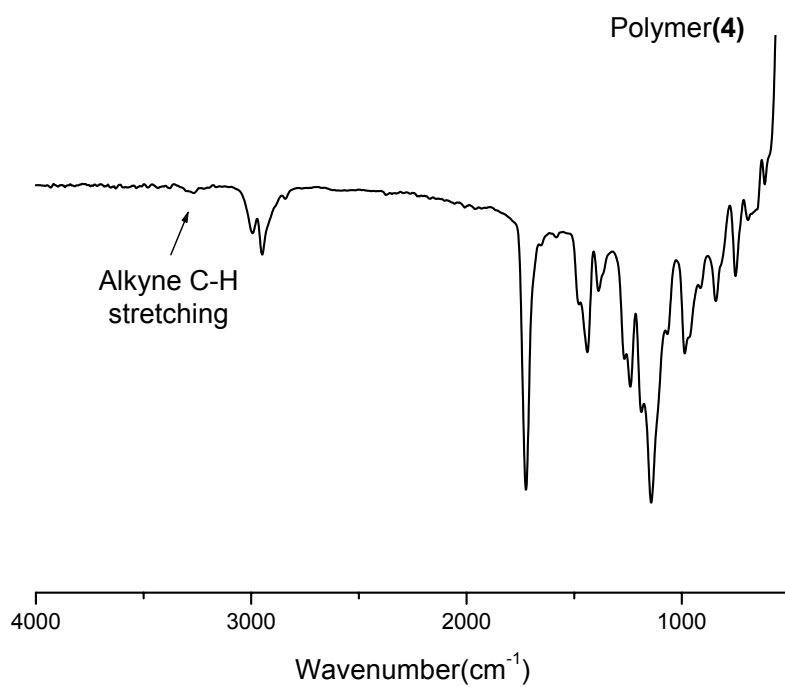

**Figure S4** FT-IR spectrum of polymer (4).
